# Supplementary material for: Differential Expression Levels of Integrin α6 Enable the Selective Identification and Isolation of Atrial and Ventricular Cardiomyocytes
Source: PLoS One. 2015 Nov 30;10(11):e0143538. doi: 10.1371/journal.pone.0143538 (PMC4664422; doi:10.1371/journal.pone.0143538)
Supplement: S1 Table — (XLS) [file pone.0143538.s006.xls]

## Sheet: Wiencierz et al. Table S1
No.	CD	Name	Dye	Manufacturer	Clone	Isotype	Co-labeling CM	Co-labeling blood	Titer	Staining	Secondary antibody	% Atria	% Ventricles
1	CD1d		APC	Miltenyi	1B1	rat IgG2b,k	anti-ALCAM PE	anti-CD45/anti-Ter119 FITC	1:11	10 min at 4 °C	n/a	26.21	44.26		> 90 %
2	CD3e		APC	Miltenyi	145-2C11	hamster IgG1	anti-ALCAM PE	anti-CD45/anti-Ter119 FITC	1:11	10 min at 4 °C	n/a	6.54	19.46		75 - 90 %
3	CD3		pure	BioLegend	17A2	rat IgG2b,k	n/a	n/a	1:200	10 min at 4 °C	g-a-rat IgG AF488	0.62	0.38		60 - 75 %
4	CD4		APC	Miltenyi	GK1.5	rat IgG2b	anti-ALCAM PE	anti-CD45/anti-Ter119 FITC	1:11	10 min at 4 °C	n/a	15.29	-2.03		40 - 60 %
5	CD5	Leu1	APC	eBioscience	53-7.3	rat IgG2a,k	anti-ALCAM PE	anti-CD45/anti-Ter119 FITC	1:500	10 min at 4 °C	n/a	0.48	-0.25		25 - 40 %
6	CD8a		APC	Miltenyi	53-6.7	rat IgG2a	anti-ALCAM PE	anti-CD45/anti-Ter119 FITC	1:11	10 min at 4 °C	n/a	32.55	-2.93		10 - 25 %
7	CD9		FITC	eBioscience	KMC8	rat	anti-ALCAM PE	anti-CD45/anti-Ter119 APC	1:200	10 min at 4 °C	n/a	23.17	30.78		< 10%
8	CD11c	ITGAX	APC	Miltenyi	N418	hamster IgG	anti-ALCAM PE	anti-CD45/anti-Ter119 FITC	1:11	10 min at 4 °C	n/a	6.67	-2.75
9	CD11b	MAC-1, ITGAM	APC	Miltenyi	M1/70.15.11.5	rat IgG2b	anti-ALCAM PE	anti-CD45/anti-Ter119 FITC	1:11	10 min at 4 °C	n/a	2.19	-2.96
10	CD11a	LFA1A, ITGAL	Biotin	BD	M17/4	rat IgG2a	anti-ALCAM PE	anti-CD45/anti-Ter119 FITC	1:20	10 min at 4 °C	anti-Biotin APC	-0.29	-2.27
11	CD13	ANPEP	PE	BD	R3-242	rat IgG1	n/a	anti-CD45/anti-Ter119 FITC	1:20	10 min at 4 °C	n/a	5.36	13.79
12	CD14		PE	BD	rmC5-3	rat IgG1	n/a	anti-CD45/anti-Ter119 FITC	1:20	10 min at 4 °C	n/a	-0.25	0.89
13	CD15	SSEA1	APC	Miltenyi	VIMC6	mouse IgM	anti-ALCAM PE	anti-CD45/anti-Ter119 FITC	1:11	10 min at 4 °C	n/a	3.46	-2.84
14	CD16/32		APC	Miltenyi	93	rat IgG2a	anti-ALCAM PE	anti-CD45/anti-Ter119 FITC	1:11	10 min at 4 °C	n/a	1.8	-2.33
15	CD18	ITGB2	Biotin	BD	C71/16	rat IgG2a	anti-ALCAM PE	anti-CD45/anti-Ter119 FITC	1:10	10 min at 4 °C	anti-Biotin APC	-3.6	-1.62
16	CD19		APC	Miltenyi	6D5	rat IgG2a	anti-ALCAM PE	anti-CD45/anti-Ter119 FITC	1:11	10 min at 4 °C	n/a	4.19	4.65
17	CD21/35		APC	BioLegend	7000000000	rat IgG2a,k	anti-ALCAM PE	anti-CD45/anti-Ter119 FITC	1:200	10 min at 4 °C	n/a	1.87	0.17
18	CD22	Siglec-2	FITC	BioLegend	OX-97	rat IgG1,κ	anti-ALCAM PE	anti-CD45/anti-Ter119 APC	1:200	10 min at 4 °C	n/a	0.89	0.25
19	CD23	FCeRII	FITC	BD	B3B4	rat IgG2a,k	anti-ALCAM PE	anti-CD45/anti-Ter119 APC	1:200	10 min at 4 °C	n/a	0.71	0.23
20	CD24		PE	eBioscience		rat	n/a	anti-CD45/anti-Ter119 FITC	1:200	10 min at 4 °C	n/a	33.97	55.15
21	CD25		APC	Miltenyi	7D4	rat IgM	anti-ALCAM PE	anti-CD45/anti-Ter119 FITC	1:11	10 min at 4 °C	n/a	4.62	-0.22
22	CD26	DPP-4	FITC	BD	H194-112	rat IgG2a	anti-ALCAM PE	anti-CD45/anti-Ter119 APC	1:10	10 min at 4 °C	n/a	22.31	12.23
23	CD28		Biotin	Miltenyi	37.1	hamster IgG2	anti-ALCAM PE	anti-CD45/anti-Ter119 FITC	1:11	10 min at 4 °C	anti-Biotin APC	-3.86	2.68
24	CD29	ITGB1	APC	Miltenyi	HMb1-1	hamster IgG	anti-ALCAM PE	anti-CD45/anti-Ter119 FITC	1:11	10 min at 4 °C	n/a	66.58	91.01
25	CD30.1	TNFRSF8	Biotin	BD	mCD301	Arm. hamster IgG1	anti-ALCAM PE	anti-CD45/anti-Ter119 FITC	1:20	10 min at 4 °C	anti-Biotin APC	-2.07	-1.45
26	CD31	PECAM-1	Biotin	BD	390	rat IgG2a,k	anti-ALCAM PE	anti-CD45/anti-Ter119 FITC	1:50	10 min at 4 °C	anti-Biotin APC	2.61	7.19
27	CD34		Biotin	eBioscience	RAM34	rat IgG2a,k	anti-ALCAM PE	anti-CD45/anti-Ter119 FITC	1:50	10 min at 4 °C	anti-Biotin APC	15.21	14.54
28	CD38		Biotin	BioLegend	90	rat IgG2a,κ	anti-ALCAM PE	anti-CD45/anti-Ter119 FITC	1:10	10 min at 4 °C	anti-Biotin APC	18.92	26.99
29	CD40		APC	Miltenyi	FGK45.5	rat IgG2a	anti-ALCAM PE	anti-CD45/anti-Ter119 FITC	1:11	10 min at 4 °C	n/a	8.19	87.61
30	CD43	Sialophorin	APC	Miltenyi	L11	rat IgG2a	anti-ALCAM PE	anti-CD45/anti-Ter119 FITC	1:11	10 min at 4 °C	n/a	3.39	75.54
31	CD44	HCAM	APC	eBioscience	IM7	rat IgG2b,k	anti-ALCAM PE	anti-CD45/anti-Ter119 FITC	1:200	10 min at 4 °C	n/a	11.63	41.14
32	CD45.1		APC	Miltenyi	A20	Rat IgG2a	anti-ALCAM PE	anti-CD45/anti-Ter119 FITC	1:11	10 min at 4 °C	n/a	3.02	9.69
33	CD45.2		APC	Miltenyi	104-2	rat IgG2a	anti-ALCAM PE	anti-CD45/anti-Ter119 FITC	1:11	10 min at 4 °C	n/a	2.6	-1.85
34	CD45R		APC	Miltenyi	RA3682	rat IgG2a	anti-ALCAM PE	anti-CD45/anti-Ter119 FITC	1:11	10 min at 4 °C	n/a	4.88	-2.69
35	CD45RB		PE	Southern Biotech	C363.16A	rat IgG2a,k	n/a	anti-CD45/anti-Ter119 FITC	1:50	10 min at 4 °C	n/a	2.63	1.8
36	CD48	BCM1	Biotin	eBioscience	HM48-1	Arm. hamster IgG	anti-ALCAM PE	anti-CD45/anti-Ter119 FITC	1:20	10 min at 4 °C	anti-Biotin APC	1.1	0.34
37	CD49d	ITGA4, VLA4	APC	Miltenyi	R1-2	rat IgG2b	anti-ALCAM PE	anti-CD45/anti-Ter119 FITC	1:11	10 min at 4 °C	n/a	18.31	29.1
38	CD49b	ITGA2, VLA2	APC	Miltenyi	DX5	rat IgM	anti-ALCAM PE	anti-CD45/anti-Ter119 FITC	1:11	10 min at 4 °C	n/a	16.82	29.95
39	CD49e	ITGA5, VAL5	PE	BD	5H10-27	rat IgG2a	n/a	anti-CD45/anti-Ter119 FITC	1:20	10 min at 4 °C	n/a	34.12	92.28
40	CD49f	ITGA6, VAL6	PE	BD	GoH3	rat IgG2a,k	n/a	anti-CD45/anti-Ter119 FITC	1:20	10 min at 4 °C	n/a	59.48	84.67
41	CD54	ICAM-1	Biotin	BD	300	Arm. hamster IgG1	anti-ALCAM PE	anti-CD45/anti-Ter119 FITC	1:20	10 min at 4 °C	anti-Biotin APC	-0.17	8.08
42	CD55	DAF	PE	BD	RIKO-5	Arm. hamster IgG3	n/a	anti-CD45/anti-Ter119 FITC	1:20	10 min at 4 °C	n/a	32.73	19.68
43	CD56	NCAM	PE	Abcam	MEM-188	mouse IgG2a	n/a	anti-CD45/anti-Ter119 FITC	1:5	10 min at 4 °C	n/a	0	0.09
44	CD61	ITGB3, GPIIIa	Biotin	BD	2C9.G2	Arm. hamster IgG1	anti-ALCAM PE	anti-CD45/anti-Ter119 FITC	1:20	10 min at 4 °C	anti-Biotin APC	9.36	6.88
45	CD62L	L-selectin	APC	Miltenyi	MEL14_H2.100	rat IgG2a	anti-ALCAM PE	anti-CD45/anti-Ter119 FITC	1:11	10 min at 4 °C	n/a	38.87	34.96
46	CD62P	P-selectin	Biotin	BD	RB40.34	rat IgG1 Lamda	anti-ALCAM PE	anti-CD45/anti-Ter119 FITC	1:20	10 min at 4 °C	anti-Biotin APC	5.78	-1.14
47	CD64a/b		PE	BD	X54-5/7.1.1	mouse IgG	n/a	anti-CD45/anti-Ter119 FITC	1:50	10 min at 4 °C	n/a	4.42	2.72
48	CD66a	CEACAM1	PE	eBioscience	CC1	mouse IgG1	n/a	anti-CD45/anti-Ter119 FITC	1:200	10 min at 4 °C	n/a	4	5.7
49	CD70		PE	BD	FR70	rat IgG2b,k	n/a	anti-CD45/anti-Ter119 FITC	1:20	10 min at 4 °C	n/a	2.66	1.04
50	CD72a,b,d		FITC	BD	K10.6	mouse IgG2b	anti-ALCAM PE	anti-CD45/anti-Ter119 APC	1:20	10 min at 4 °C	n/a	1.57	0.6
51	CD73	NT5E	PE	BD	TY/23	rat IgG2a,k	n/a	anti-CD45/anti-Ter119 FITC	1:20	10 min at 4 °C	n/a	5.03	23.49
52	CD74		pure	BD	In-1	rat IgG2b	n/a	n/a	1:20	10 min at 4 °C	g-a-rat IgG AF488	0.95	0.32
53	CD79b		pure	BD	HM79b	Arm. hamster IgG2 lamda1	anti-ALCAM PE	anti-CD45/anti-Ter119 APC	1:20	10 min at 4 °C	m-a-ham IgG FITC	3.43	0.1
54	CD81	Tspan-28	APC	Miltenyi	Eat2	hamster IgG1	anti-ALCAM PE	anti-CD45/anti-Ter119 FITC	1:11	10 min at 4 °C	n/a	58.15	89.82
55	CD83		PE	BioLegend	Michel-19	rat IgG1,κ	n/a	anti-CD45/anti-Ter119 FITC	1904-01-01 01:50:00	10 min at 4 °C	n/a	4.92	0.8
56	CD86	B7-2	APC	Miltenyi	PO3.3	rat IgG2b	anti-ALCAM PE	anti-CD45/anti-Ter119 FITC	1:11	10 min at 4 °C	n/a	2.67	4.18
57	CD90.1	Thy1.1	APC	Miltenyi	His51	mouse IgG2a	anti-ALCAM PE	anti-CD45/anti-Ter119 FITC	1:11	10 min at 4 °C	n/a	5.13	-0.27
58	CD90.2	Thy1.2	APC	Miltenyi	30-H12	rat IgG2b	anti-ALCAM PE	anti-CD45/anti-Ter119 FITC	1:11	10 min at 4 °C	n/a	3.91	2.15
59	CD93	C1qRp	APC	eBioscience	AA4.1	rat IgG2b,k	anti-ALCAM PE	anti-CD45/anti-Ter119 FITC	1:200	10 min at 4 °C	n/a	1.2	1.01
60	CD94	KLRD1	Biotin	BD	18d3	rat IgG2a	anti-ALCAM PE	anti-CD45/anti-Ter119 FITC	1:20	10 min at 4 °C	anti-Biotin APC	0.46	6.34
61	CD95	Fas Receptor	Biotin	BD	Jo2	hamster IgG2	anti-ALCAM PE	anti-CD45/anti-Ter119 FITC	1:50	10 min at 4 °C	anti-Biotin APC	-2.99	-1.52
62	CD102	ICAM-2	Biotin	BD	3C4(m/C2/4)	rat IgG2a	anti-ALCAM PE	anti-CD45/anti-Ter119 FITC	1:20	10 min at 4 °C	anti-Biotin APC	0.57	8.31
63	CD103	ITGAE	FITC	BD	M290	rat IgG2a	anti-ALCAM PE	anti-CD45/anti-Ter119 APC	1:20	10 min at 4 °C	n/a	11.7	2.54
64	CD105	Endoglin	APC	Miltenyi	MJ7/18	rat IgG2a	anti-ALCAM PE	anti-CD45/anti-Ter119 FITC	1:11	10 min at 4 °C	n/a	29.04	52.21
65	CD106	VCAM-1	FITC	BD	429	rat IgG2a	anti-ALCAM PE	anti-CD45/anti-Ter119 APC	1:20	10 min at 4 °C	n/a	14.09	21.39
66	CD112	Nectin 2	pure	Santa Cruz	502-57	rat IgG2a	n/a	n/a	1:10	10 min at 4 °C	g-a-rat IgG AF488	16.38	39.3
67	CD115	M-CSF R	APC	eBioscience	AFS98	rat IgG2a,κ	anti-ALCAM PE	anti-CD45/anti-Ter119 FITC	1:100	10 min at 4 °C	n/a	1.28	-0.43
68	CD117	c-kit	APC	Miltenyi	3C1	rat IgG2b	anti-ALCAM PE	anti-CD45/anti-Ter119 FITC	1:11	10 min at 4 °C	n/a	9.96	33.56
69	CD119		Biotin	BD	GR20	rat IgG2a	anti-ALCAM PE	anti-CD45/anti-Ter119 FITC	1:20	10 min at 4 °C	anti-Biotin APC	4.91	2.88
70	CD122	IL-2Rb	APC	Southern Biotech	5H4	rat IgG2a,k	anti-ALCAM PE	anti-CD45/anti-Ter119 FITC	1:50	10 min at 4 °C	n/a	3.36	0.91
71	CD124	IL-4R	Biotin	BD		rat IgG2a	anti-ALCAM PE	anti-CD45/anti-Ter119 FITC	1:20	10 min at 4 °C	anti-Biotin APC	0.06	0.04
72	CD125	IL-5RA	PE	BD	T21	rat IgG2a	n/a	anti-CD45/anti-Ter119 APC	1:100	10 min at 4 °C	n/a	47.77	10.3
73	CD126	IL-6R	PE	BD	D7715A7	rat IgG2b	n/a	anti-CD45/anti-Ter119 FITC	1:20	10 min at 4 °C	n/a	5.88	1.62
74	CD127	IL-7RA	Biotin	Miltenyi	A7R34	rat IgG2a	anti-ALCAM PE	anti-CD45/anti-Ter119 FITC	1:11	10 min at 4 °C	anti-Biotin APC	-3.94	-0.62
75	CD131		PE	BD	JORO50	rat IgG1	n/a	anti-CD45/anti-Ter119 FITC	1:20	10 min at 4 °C	n/a	16.05	2.41
76	CD132	IL-2RG	Biotin	BD	TUGm2	rat IgG2b	anti-ALCAM PE	anti-CD45/anti-Ter119 FITC	1:20	10 min at 4 °C	anti-Biotin APC	0	-0.01
77	CD133	Prominin	APC	Miltenyi	MB9-3G8	rat IgG	anti-ALCAM PE	anti-CD45/anti-Ter119 FITC	1:11	10 min at 4 °C	n/a	10.99	-2.34
78	CD134	TNFRSF4, OX40	PE	BioLegend	OX-86	rat IgG1,k	n/a	anti-CD45/anti-Ter119 FITC	1:100	10 min at 4 °C	n/a	1.3	0.94
79	CD135	Flk2, Flt3	PE	eBioscience	A2F10	rat IgG2a,k	n/a	anti-CD45/anti-Ter119 FITC	1:20	10 min at 4 °C	n/a	1.08	1.2
80	CD137	TNFRSF9	PE	eBioscience	17B5	Golden Syr. Hamster IgG	n/a	anti-CD45/anti-Ter119 FITC	1:100	10 min at 4 °C	n/a	-0.66	2.31
81	CD138	Syndecan 1	pure	BD	281-2	rat IgG2a,k	n/a	n/a	1904-01-01 01:50:00	10 min at 4 °C	g-a-rat IgG AF488	0.43	0.31
82	CD140a	PDGFRa	APC	Miltenyi	APA5	rat IgG2a,k	anti-ALCAM PE	anti-CD45/anti-Ter119 FITC	1:11	10 min at 4 °C	n/a	17.11	26.38
83	CD140b	PDGFRb	APC	Miltenyi	APB5	rat IgG2a,k	anti-ALCAM PE	anti-CD45/anti-Ter119 FITC	1:11	10 min at 4 °C	n/a	26.51	38.87
84	CD146	LSEC	Biotin	Miltenyi	ME-9F1	rat IgG2a	anti-ALCAM PE	anti-CD45/anti-Ter119 FITC	1:11	10 min at 4 °C	anti-Biotin APC	21.54	58.1
85	CD150	SLAMF1	pure	Serotec		rat	n/a	n/a	1:10	10 min at 4 °C	g-a-rat IgG AF488	0.97	0.55
86	CD152	CTLA-4	PE	BD	UC10-4F10-11	Arm. hamster IgG1	n/a	anti-CD45/anti-Ter119 FITC	1:20	10 min at 4 °C	n/a	2.96	2.23
87	CD154	CD40L	APC	Miltenyi	MR1	hamster IgG3	anti-ALCAM PE	anti-CD45/anti-Ter119 FITC	1:11	10 min at 4 °C	n/a	2.36	-4.16
88	CD155	PVR	APC	eBioscience	TX56	rat IgG2a	anti-ALCAM PE	anti-CD45/anti-Ter119 FITC	1:20	10 min at 4 °C	n/a	13.06	17.07
89	CD162	SELPLG	PE	BD	2PH1	rat IgG1	n/a	anti-CD45/anti-Ter119 FITC	1:20	10 min at 4 °C	n/a	-0.23	0.22
90	CD164	Endolyn, MUC-24	pure	Santa Cruz		rabbit IgG, polyclonal	n/a	anti-CD45/anti-Ter119 APC	1:50	10 min at 4 °C	g-a-rab IgG PE	10.13	1.17
91	CD178.1	Fas Ligand	Biotin	BD	Kay-10	mouse IgG2b	anti-ALCAM PE	anti-CD45/anti-Ter119 FITC	1:20	10 min at 4 °C	anti-Biotin APC	0	-0.01
92	CD179b	IGLL1	Biotin	BD	LM34	rat IgG2a	anti-ALCAM PE	anti-CD45/anti-Ter119 FITC	1:20	10 min at 4 °C	anti-Biotin APC	0	-0.01
93	CD180		Biotin	BD	RP/14	rat IgG2a	anti-ALCAM PE	anti-CD45/anti-Ter119 FITC	1:20	10 min at 4 °C	anti-Biotin APC	0.14	-0.01
94	CD184	CXCR4	Biotin	BD	2B11	rat IgG2b,k	anti-ALCAM PE	anti-CD45/anti-Ter119 FITC	1:50	10 min at 4 °C	anti-Biotin APC	0.8	1.67
95	CD192	CCR2	PE	R&D Systems		rat IgG2b	n/a	anti-CD45/anti-Ter119 FITC	1:10	30 min at RT	n/a	6.06	0.6
96	CD195	CCR5	Biotin	BD	C34-3448	rat IgG2c	anti-ALCAM PE	anti-CD45/anti-Ter119 FITC	1:20	10 min at 4 °C	anti-Biotin APC	0	0.02
97	CD197	CCR7	PE	BioLegend	4B12	rat IgG2a,k	n/a	anti-CD45/anti-Ter119 FITC	1:50	10 min at 4 °C	n/a	-0.45	0.28
98	CD200	OX-2	Biotin	BioLegend	OX-90	rat IgG2a,κ	anti-ALCAM PE	anti-CD45/anti-Ter119 FITC	1:200	10 min at 4 °C	anti-Biotin APC	28.61	32.47
99	CD201	EPCR	PE	eBioscience	eBio1560	rat IgG2b,κ	n/a	anti-CD45/anti-Ter119 FITC	1:10	10 min at 4 °C	n/a	-0.83	7.3
100	CD204	SCAVENGER RECEPTOR TYPE I/II	PE	Serotec	2F8	rat IgG2b	n/a	anti-CD45/anti-Ter119 FITC	1:10	10 min at 4 °C	n/a	1.85	0.21
101	CD205	DEC205	APC	Miltenyi	NLDC145	Rat IgG2a	anti-ALCAM PE	anti-CD45/anti-Ter119 FITC	1:11	10 min at 4 °C	n/a	5.33	-3.6
102	CD206	Mannose receptor, c type 1	PE	Serotec	MR5D3	rat IgG2a	n/a	anti-CD45/anti-Ter119 FITC	1:10	10 min at 4 °C	n/a	0	0.01
103	CD209b	SIGN-R1	APC	eBioscience	eBio22D1	hamster IgG	anti-ALCAM PE	anti-CD45/anti-Ter119 FITC	1:20	10 min at 4 °C	n/a	0.45	0.78
104	CD210	IL10RA	PE		1B1.3a	rat IgG1,k	n/a	anti-CD45/anti-Ter119 FITC	1:20	10 min at 4 °C	n/a	0.48	7.91
105	CD212	IL12RB1	Biotin	BD	114	mouse IgG2a	anti-ALCAM PE	anti-CD45/anti-Ter119 FITC	1:20	10 min at 4 °C	anti-Biotin APC	0.08	0
106	CD223	LAG3	PE	BD	C9B7W	rat IgG1,k	n/a	anti-CD45/anti-Ter119 FITC	1:20	10 min at 4 °C	n/a	-0.5	0.85
107	CD229.1	Ly-9	Biotin	BD	30C7	rat IgG2a	anti-ALCAM PE	anti-CD45/anti-Ter119 FITC	1:20	10 min at 4 °C	anti-Biotin APC	0	-0.01
108	CD230	Prion Protein	pure	IBL International	SAF-83	mouse IgG1	anti-ALCAM PE	anti-CD45/anti-Ter119 APC	1:50	10 min at 4 °C	g-a-m IgG AF488	37.18	49.56
109	CD244.2	GGT1	Biotin	BD	2B4	mouse IgG2b	anti-ALCAM PE	anti-CD45/anti-Ter119 FITC	1:20	10 min at 4 °C	anti-Biotin APC	0.23	0.05
110	CD262	DR5, TRAIL-R2	PE	BioLegend	MD5-1	Arm. hamster IgG	n/a	anti-CD45/anti-Ter119 FITC	1:100	10 min at 4 °C	n/a	-0.16	1.67
111	CD268	TNFRSF13C	APC	Miltenyi	7H22-E16	rat IgG1,k	anti-ALCAM PE	anti-CD45/anti-Ter119 FITC	1:11	10 min at 4 °C	n/a	3.8	-3.89
112	CD273	PD-L2	PE	BD	TY25	rat IgG2a	n/a	anti-CD45/anti-Ter119 FITC	1:20	10 min at 4 °C	n/a	0.76	0.52
113	CD278	ICOS	APC	Miltenyi	7E.17G9	rat IgG2b,k	anti-ALCAM PE	anti-CD45/anti-Ter119 FITC	1:11	10 min at 4 °C	n/a	2.18	-4.01
114	CD279	PD-1	APC	Miltenyi	HA2-7B1	rat IgG2b	anti-ALCAM PE	anti-CD45/anti-Ter119 FITC	1:11	10 min at 4 °C	n/a	2.29	-3.88
115	CD282	TLR2	Biotin	BioLegend	T2.5	mouse IgG1,κ	anti-ALCAM PE	anti-CD45/anti-Ter119 FITC	1:50	10 min at 4 °C	anti-Biotin APC	0.39	2.08
116	CD284	284/MD-2 Komplex	PE	BD	MTS510	IgG2a,k	n/a	anti-CD45/anti-Ter119 FITC	1:20	10 min at 4 °C	n/a	77.71	91.85
117	CD309	FLK-1, VEGFR-2	APC	eBioscience	Avas 12α1	rat IgG2a,k	anti-ALCAM PE	anti-CD45/anti-Ter119 FITC	1:40	10 min at 4 °C	n/a	2.34	1.45
118	CD315	FPRP	pure	R&D Systems		sheep IgG, polyclonal	anti-ALCAM PE	anti-CD45/anti-Ter119 FITC	1:4	10 min at 4 °C	d-a-sh IgG AF647	62.6	80.53
119	CD317	PDCA1	APC	Miltenyi	JF05-1C2.4.1	rat IgG2b	anti-ALCAM PE	anti-CD45/anti-Ter119 FITC	1:11	10 min at 4 °C	n/a	0.5	0
120	CD324	E-Cadherin	APC	R&D Systems	114420	rat IgG2a	anti-ALCAM PE	anti-CD45/anti-Ter119 FITC	1:10	10 min at 4 °C	n/a	8.84	0.49
121	CD326	Ep-CAM	APC	BioLegend	G8.8	rat IgG2a,κ	anti-ALCAM PE	anti-CD45/anti-Ter119 FITC	1:100	10 min at 4 °C	n/a	14.92	1.31
122	CD332	FGFR2	pure	Abgent	RB1567	rabbit Ig, polyclonal	n/a	anti-CD45/anti-Ter119 APC	1:10	10 min at 4 °C	g-a-rab IgG PE	4.47	0.14
123	CD333	FGFR3	pure	R&D Systems	136812	rat IgG2a	n/a	n/a	1:10	10 min at 4 °C	g-a-rat IgG AF488	36.1	10.68
124	CD335	NKp46	APC	Miltenyi	29A1.4	rat IgG2a	anti-ALCAM PE	anti-CD45/anti-Ter119 FITC	1:11	10 min at 4 °C	n/a	0.02	-0.09
125	CD339	Jagged-1	PE	eBioscience	HMJ1-29	Arm. hamster IgG	n/a	anti-CD45/anti-Ter119 FITC	1:200	10 min at 4 °C	n/a	-1.25	1
126	CD357	GITR	APC	Miltenyi	DTA-1	rat IgG2b	anti-ALCAM PE	anti-CD45/anti-Ter119 FITC	1:11	10 min at 4 °C	n/a	0.16	-0.09
127		Feeder	APC	Miltenyi	mEF-SK4	rat IgG1	anti-ALCAM PE	anti-CD45/anti-Ter119 FITC	1:11	10 min at 4 °C	n/a	52.49	77.37
128		GLAST, Slc1A3	APC	Miltenyi	ACSA-1	mouse IgG2a	anti-ALCAM PE	anti-CD45/anti-Ter119 FITC	1:11	10 min at 4 °C	n/a	10.85	0.93
129		DO11.10 TCR	APC	Miltenyi	KJ1-26	mouse IgG2a	anti-ALCAM PE	anti-CD45/anti-Ter119 FITC	1:11	10 min at 4 °C	n/a	0.04	-0.03
130		H2Kk (MHC class I)	APC	Miltenyi	H100-27.R55	mouse IgG2a	anti-ALCAM PE	anti-CD45/anti-Ter119 FITC	1:11	10 min at 4 °C	n/a	0.22	-0.05
131		NK1.1	APC	Miltenyi	PK136	mouse IgG2a	anti-ALCAM PE	anti-CD45/anti-Ter119 FITC	1:11	10 min at 4 °C	n/a	0.26	-0.01
132		A2B5	APC	Miltenyi	105HB29	mouse IgM	anti-ALCAM PE	anti-CD45/anti-Ter119 FITC	1:11	10 min at 4 °C	n/a	29.26	34.26
133		PSA-NCAM	APC	Miltenyi	2-2B	mouse IgM	anti-ALCAM PE	anti-CD45/anti-Ter119 FITC	1:11	10 min at 4 °C	n/a	15.99	3.94
134		Siglec H	APC	Miltenyi	551.3D3	rat IgG1	anti-ALCAM PE	anti-CD45/anti-Ter119 FITC	1:11	10 min at 4 °C	n/a	0.17	0.14
135		Ly-6C	APC	Miltenyi	1G7.G10	rat IgG2a	anti-ALCAM PE	anti-CD45/anti-Ter119 FITC	1:11	10 min at 4 °C	n/a	0.46	-0.71
136		Ly-6G; Gr1	APC	Miltenyi	1A8	rat IgG2a	anti-ALCAM PE	anti-CD45/anti-Ter119 FITC	1:11	10 min at 4 °C	n/a	1.1	-0.49
137		Sca-1	APC	Miltenyi	D7	rat IgG2a	anti-ALCAM PE	anti-CD45/anti-Ter119 FITC	1:11	10 min at 4 °C	n/a	1.21	-0.04
138		DCIR2	APC	Miltenyi	33D1	rat IgG2b	anti-ALCAM PE	anti-CD45/anti-Ter119 FITC	1:11	10 min at 4 °C	n/a	0.59	-0.24
139		DCAR1	APC	Miltenyi	SKa5-3D5	rat IgG2b	anti-ALCAM PE	anti-CD45/anti-Ter119 FITC	1:11	10 min at 4 °C	n/a	0.51	-0.11
140		FR4; Folr4	APC	Miltenyi	TH6	rat IgG2b	anti-ALCAM PE	anti-CD45/anti-Ter119 FITC	1:11	10 min at 4 °C	n/a	1.99	-0.25
141		Gr-1	APC	Miltenyi	RB6-8C5	rat IgG2b	anti-ALCAM PE	anti-CD45/anti-Ter119 FITC	1:11	10 min at 4 °C	n/a	2.14	-0.02
142		MHC class II	APC	Miltenyi	M5/114.15.2	rat IgG2b	anti-ALCAM PE	anti-CD45/anti-Ter119 FITC	1:11	10 min at 4 °C	n/a	1.25	0.16
143		FceRIa	APC	Miltenyi	MAR-1	hamster IgG	anti-ALCAM PE	anti-CD45/anti-Ter119 FITC	1:11	10 min at 4 °C	n/a	2.76	0.18
144		Rae-1	APC	R&D Systems	186107	rat IgG2a	anti-ALCAM PE	anti-CD45/anti-Ter119 FITC	1:5	45 min at 4 °C	n/a	17.25	21.97
145		Siglec-F	Biotin	Miltenyi			anti-ALCAM PE	anti-CD45/anti-Ter119 FITC	1:200	10 min at 4 °C	anti-Biotin APC	-0.82	2.73
146		VEGFR3 (Flt4)	Biotin	R&D Systems	BAF743	goat IgG, polyclonal	anti-ALCAM PE	anti-CD45/anti-Ter119 FITC	1:10	10 min at 4 °C	anti-Biotin APC	0.08	0.03
147		Clec12A	Biotin		1/06-5D3		anti-ALCAM PE	anti-CD45/anti-Ter119 FITC	1:11	10 min at 4 °C	anti-Biotin APC	0	0
148		Dectin-2	FITC	Miltenyi	KVa7-6E7	rat IgG2a	anti-ALCAM PE	anti-CD45/anti-Ter119 APC	1:11	10 min at 4 °C	n/a	1.25	0.3
149		TCR (gdTCR)	PE	BD	GL3	Arm. hamster IgG2,k	n/a	anti-CD45/anti-Ter119 FITC	1:50	10 min at 4 °C	n/a	2.66	4.78
150		F4/80	PE	BioLegend	BM8	rat IgG2b	n/a	anti-CD45/anti-Ter119 FITC	1:20	10 min at 4 °C	n/a	0.15	1
151		Notch3	PE	BioLegend	HMN3-133	Arm. hamster IgG	n/a	anti-CD45/anti-Ter119 FITC		10 min at 4 °C	n/a	-0.75	1.26
152		Notch4	PE	BioLegend	HMN4-14	Arm. hamster IgG	n/a	anti-CD45/anti-Ter119 FITC		10 min at 4 °C	n/a	-0.05	3.32
153		Delta like 1	PE	BioLegend	HMD1-3	Arm. hamster IgG	n/a	anti-CD45/anti-Ter119 FITC	1:50	10 min at 4 °C	n/a	-1.45	0.26
154		Delta like 4	PE	BioLegend	HMD4-1	Arm. hamster IgG	n/a	anti-CD45/anti-Ter119 FITC	1:50	10 min at 4 °C	n/a	-1.04	0.23
155		Notch1	PE	BioLegend	HMN1	Arm. hamster IgG	n/a	anti-CD45/anti-Ter119 FITC	1:50	10 min at 4 °C	n/a	-0.52	0.45
156		Notch2	PE	BioLegend	HMN2-35	Arm. hamster IgG	n/a	anti-CD45/anti-Ter119 FITC	1:50	10 min at 4 °C	n/a	0.56	1.43
157		Integrin beta7	PE	BioLegend	FIB504	rat IgG2a,k	n/a	anti-CD45/anti-Ter119 FITC	1:5	10 min at 4 °C	n/a	-1.04	0.08
158		Jagged 2	PE	Biolegend	HMJ2-1	Arm. hamster IgG	n/a	anti-CD45/anti-Ter119 FITC	1:20	10 min at 4 °C	n/a	-0.45	0.89
159		BP-1 (Ly-51/6C3)	PE	eBioscience		rat	n/a	anti-CD45/anti-Ter119 FITC	1:200	10 min at 4 °C	n/a	31.22	18.78
160		Tim-3	PE	eBioscience	8B.2C12	rat IgG1,κ	n/a	anti-CD45/anti-Ter119 FITC	1:20	10 min at 4 °C	n/a	0.47	1.85
161		TREM-1	PE	R&D Systems	174031	rat IgG2a	n/a	anti-CD45/anti-Ter119 FITC	1:10	10 min at 4 °C	n/a	0.06	0.04
162		VEGFR1 (Flt1)	PE	R&D Systems	141522	rat IgG2b	n/a	anti-CD45/anti-Ter119 FITC	1:5	30 min at 4 °C	n/a	57.27	14.5
163		KLRG1; Clec15a	PE	Southern Biotech		hamster	n/a	anti-CD45/anti-Ter119 FITC	1:50	10 min at 4 °C	n/a	0	0.02
164		Clec9a	PE		42/04-42D2	rat IgG2a	n/a	anti-CD45/anti-Ter119 FITC	1:5	30 min at RT	n/a	0.5	0.46
165		LRRC32; GARP	pure	Axxora	Plato-1	mouse IgG2b	anti-ALCAM PE	anti-CD45/anti-Ter119 APC	1:200	10 min at 4 °C	g-a-m IgG AF488	12.08	3.43
166		Frizzled-2	pure	R&D Systems	202102	rat IgG2a	n/a	n/a	1:10	10 min at 4 °C	g-a-rat IgG AF488	25.05	6.66
167		Ephrin B2	pure	R&D Systems		goat IgG, polyclonal	anti-ALCAM PE	anti-CD45/anti-Ter119 FITC	1:50	10 min at 4 °C	d-a-g IgG AF647	0.99	0.28
168		ACTR-IC	pure	Santa Cruz	V-18	goat IgG, polyclonal	anti-ALCAM PE	anti-CD45/anti-Ter119 FITC	1:50	10 min at 4 °C	d-a-g IgG AF647	4.6	0.6
169		DDR2	pure	Santa Cruz	N-20	goat IgG, polyclonal	anti-ALCAM PE	anti-CD45/anti-Ter119 FITC	1:10	10 min at 4 °C	d-a-g IgG AF647	43.18	0.96
170		ACTR-IIA	pure	Santa Cruz	A-24	rabbit IgG, polyclonal	n/a	anti-CD45/anti-Ter119 APC	1:50	10 min at 4 °C	g-a-rab IgG PE	-0.05	-0.01
		mouse anti-arm. Hamster IgG	FITC	BD	G70-204, G94-56	mouse			1:400	10 min at 4 °C
		donkey anti-sheep IgG (H+L)	Alexa647	Invitrogen	polyclonal				1:400	10 min at 4 °C
		donkey anti-goat IgG	Alexa647	Invitrogen	polyclonal				1:400	10 min at 4 °C
		goat anti-rabbit-IgG	PE	Invitrogen	polyclonal				1:400	10 min at 4 °C
		goat anti-mouse-IgG (H+L)	Alexa488	Invitrogen	polyclonal				1:400	10 min at 4 °C
		goat anti-rat-IgG (H+L)	Alexa488	Invitrogen	polyclonal				1:400	10 min at 4 °C
		anti-Biotin	APC	Miltenyi	Bio3-18E7				1:11	10 min at 4 °C
		mFCR-Block		Miltenyi					1:10	5 min at 4 °C
	CD166	ALCAM	PE	eBioscience	eBioALC48	rat IgG2a,κ			1:100	10 min at 4 °C
	CD45		FITC	Miltenyi	30F11	rat IgG2b			1:11	10 min at 4 °C
	CD45		APC	Miltenyi	30F11	rat IgG2b			1:11	10 min at 4 °C
		TER-119	FITC	Miltenyi	Ter-119	rat IgG2b			1:11	10 min at 4 °C
		TER-119	APC	Miltenyi	Ter-119	rat IgG2b			1:11	10 min at 4 °C
